# Supplementary material for: Effect of Ulceration on the Therapeutic Benefit of Surgery in Patients with Stage IV Melanoma: A Surveillance, Epidemiology, and End Results Analysis from 2004–2015
Source: Research Square preprint supplement (doi:10.21203/rs.3.rs-96111/v1), 2020-10-26
Supplement: Supplementary file 1 [file 5d7ca9aa26daadee71f1c4aa.xlsx]

## Sheet: Sheet1
Table 4 Univariate analyses of factors predicting surgery
Variance	P value	OR	95% confidence interval
Age at diagnosis (years)	<0.001
<50		Reference
≥50	<0.001	1.496	1.294-1.730
Gender	0.173
Female		Reference
Male	0.173	0.919	0.813-1.038
Race	0.037
White		Reference
Black	0.338	1.251	0.791-1.976
Other/Unknown	0.016	1.583	1.088-2.303
Metastase in bone	<0.001
Yes		Reference
NO	<0.001	1.67345	1.366-2.050
Unknown	0.201	1.46655	0.815-2.639
Metastase in brain	0.728843
Yes		Reference
NO	0.48853	0.943	0.799-1.113
Unknown	0.589656	0.868	0.519-1.451
Metastase in liver	<0.001
Yes		Reference
NO	<0.001	2.52	2.067-3.072
Unknown	0.45	1.225	0.723-2.076
Metastase in lung	<0.001
Yes		Reference
NO	<0.001	1.59	1.349-1.875
Unknown	0.86	0.957	0.590-1.554
Ulceration status	<0.001
Non-ulcerated cases		Reference
Ulcerated cases	<0.001	0.236	0.189-0.295
Unknown	<0.001	2.379	2.085-2.715
LDH	<0.001
Normal		Reference
Elevated, <1.5 × ULN	0.001	1.802	1.283-2.529
Elevated, 1.5–10 × ULN	<0.001	2.707	1.814-4.040
Elevated, more than 10 × ULN	<0.001	2.857	1.664-4.906
Unknown	0.003	1.437	1.132-1.823
Abbreviations:LDH, lactate dehydrogenase; ULN, upper limit of normal.
